# Supplementary material for: Giant high-temperature piezoelectricity in perovskite oxides for vibration energy harvesting
Source: Royal Society of Chemistry journal article supplement (doi:10.1039/d0ta09796a), 2020-12-12
Supplement: d0ta09796a1.pdf [file d0ta09796a1.pdf]

## Supporting Information

### Giant High-temperature Piezoelectricity in Perovskite oxides for Vibration Energy Harvesting

Haiyan Zhao,<sup>a,b</sup> Yudong Hou,<sup>a,\*</sup> Xiaole Yu,<sup>a</sup> Mupeng Zheng,<sup>a</sup> Mankang Zhu<sup>a</sup>

<sup>a</sup>Faculty of Materials and Manufacturing, Key Laboratory of Advanced Functional Materials, Education Ministry of China, Beijing University of Technology, Beijing 100124, China

<sup>b</sup>Tangshan Normal University, Tangshan 063000, China

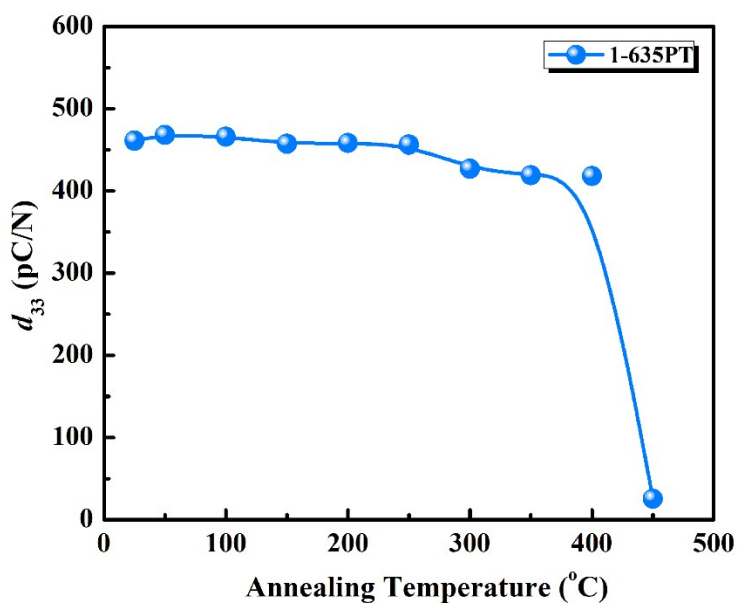

**Fig. S1.** Variation of the  $d_{33}$  of 1-635PT sample as a function of annealing temperature.

---

\* Corresponding author. E-mail: [ydhoul@bjut.edu.cn](mailto:ydhoul@bjut.edu.cn)

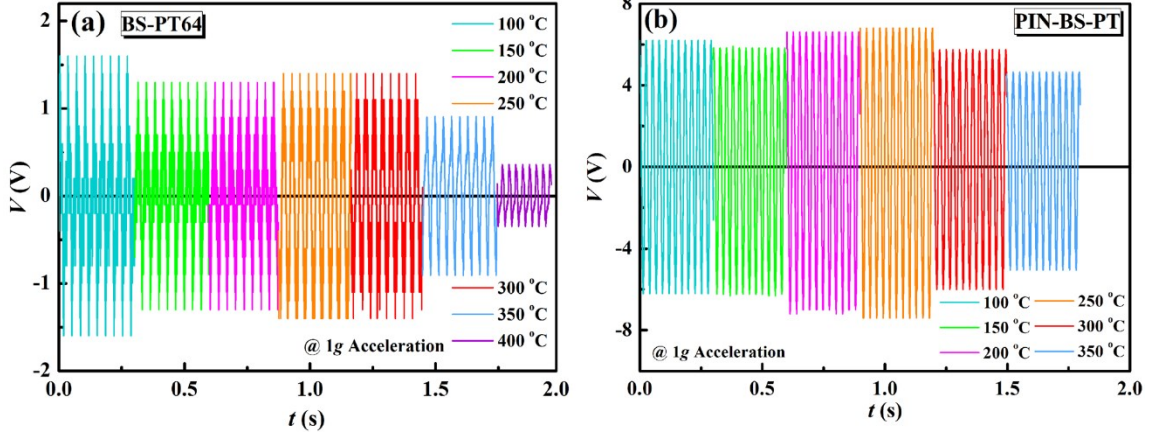

**Fig. S2.** The open output voltage as a function of temperature for (a) BS-PT64 harvester<sup>1</sup> and (b) PIN-BS-PT harvester at resonate frequencies under 1g acceleration.

**Table S1.** Curie temperature and room temperature electrical properties of  $z$ BS- $x$ PT- $y$ BZH ceramics.

| Serie      | $x$   | $T_c$ (°C) | $d_{33}$ (pC/N) | $\epsilon_r$ | $\tan\delta$ |
|------------|-------|------------|-----------------|--------------|--------------|
| $y = 0.01$ | 0.620 | 418        | 280             | 1024         | 0.026        |
|            | 0.625 | 424        | 366             | 1260         | 0.029        |
|            | 0.630 | 430        | 457             | 1483         | 0.035        |
|            | 0.635 | 431        | 461             | 1969         | 0.027        |
|            | 0.640 | 432        | 356             | 1778         | 0.021        |
|            | 0.645 | 433        | 299             | 1523         | 0.019        |
| $y = 0.02$ | 0.650 | 442        | 265             | 1314         | 0.017        |
|            | 0.620 | 422        | 383             | 1273         | 0.038        |
|            | 0.625 | 426        | 456             | 1651         | 0.038        |
|            | 0.630 | 431        | 377             | 1602         | 0.027        |
|            | 0.635 | 432        | 310             | 1315         | 0.023        |
| $y = 0.03$ | 0.640 | 432        | 297             | 1052         | 0.024        |
|            | 0.615 | 416        | 363             | 1267         | 0.036        |
|            | 0.620 | 417        | 421             | 1678         | 0.035        |
|            | 0.625 | 419        | 369             | 1755         | 0.036        |
|            | 0.630 | 423        | 335             | 1594         | 0.034        |
|            | 0.635 | 426        | 306             | 1482         | 0.029        |

**Table S2.** The  $d_{33}$  values of piezoceramics at different test temperatures ( $T$ ) by *in situ* method.

| Composition        | $T_1(^{\circ}\text{C})$ | $d_{33-1}$ (pC/N) | $T_2(^{\circ}\text{C})$ | $d_{33-2}$ (pC/N) | $T_3(^{\circ}\text{C})$ | $d_{33-3}$ (pC/N) | Methods             | Ref.      |
|--------------------|-------------------------|-------------------|-------------------------|-------------------|-------------------------|-------------------|---------------------|-----------|
| PZT5               | ~220                    | ~700              | —                       | —                 | —                       | —                 | quasi-static method | 2         |
| PZT8               | ~275                    | 340               | —                       | —                 | —                       | —                 | quasi-static method | 3         |
| PZT5               | 250                     | 577               | —                       | —                 | —                       | —                 | quasi-static method | 3         |
| PZN-PZT            | 200                     | 385               | 350                     | 43                | —                       | —                 | quasi-static method | 4         |
| BYPT-PZ-La         | ~325                    | ~325              | —                       | —                 | —                       | —                 | quasi-static method | 2         |
| KNNLx-BZ-BNT       | 150                     | ~270              | —                       | —                 | —                       | —                 | quasi-static method | 5         |
| NBT-BT             | 90                      | 129               | —                       | —                 | —                       | —                 | quasi-static method | 4         |
| NBT-Fe             | 180                     | 133               | —                       | —                 | —                       | —                 | laser vibrometer    | 6         |
| BCZT               | 45                      | 332               | 100                     | 88                | —                       | —                 | quasi-static method | 4         |
| BZT-50BCT          | 25                      | 620               | 70                      | 620               | —                       | —                 | quasi-static method | 7         |
| PN-La-Mn           | ~300                    | ~100              | —                       | —                 | —                       | —                 | quasi-static method | 2         |
| BMT-40PT           | ~350                    | 370               | —                       | —                 | —                       | —                 | laser vibrometer    | 8         |
| BF-41PT            | 400                     | ~150              | —                       | —                 | —                       | —                 | laser vibrometer    | 8         |
| BS-PT64            | 20                      | 380               | 220                     | 480               | —                       | —                 | quasi-static method | 7         |
| BS-PT              | ~350                    | ~800              | —                       | —                 | —                       | —                 | quasi-static method | 2         |
| BS-PT63            | ~380                    | 780               | —                       | —                 | —                       | —                 | laser vibrometer    | 8         |
| BSPTSingle crystal | 400                     | 1300              | —                       | —                 | —                       | —                 | resonance method    | 9         |
| BS-PT64            | 25                      | 484               | 200                     | 556               | 400                     | 405               | quasi-static method | This work |
| BS-PT-PIN          | 25                      | 492               | 200                     | 675               | 400                     | 26                | quasi-static method |           |
| BZH-BS-PT          | 25                      | 461               | 200                     | 612               | 400                     | 726               | quasi-static method |           |

The  $d_{33-1}$ ,  $d_{33-2}$  and  $d_{33-3}$  in the table correspond to the  $d_{33}$  values of the materials at three different test temperatures  $T_1$ ,  $T_2$  and  $T_3$ , respectively.

The unit of  $d_{33}$  value measured by laser vibrometer is pm/V.

**Table S3.** Rietveld refinement parameters of poled ceramics *in situ* measured at different temperatures (*T*) XRD.

| Samples       | <i>T</i><br>(°C) | Phase       | Lattice parameters |              |              |             | Refined factors            |                           |          |
|---------------|------------------|-------------|--------------------|--------------|--------------|-------------|----------------------------|---------------------------|----------|
|               |                  |             | <i>a</i> (Å)       | <i>b</i> (Å) | <i>c</i> (Å) | $\beta$ (°) | <i>R</i> <sub>wp</sub> (%) | <i>R</i> <sub>p</sub> (%) | $\chi^2$ |
| BS-PT64       | 200              | <i>P4mm</i> | 4.0037             | 4.0037       | 4.0745       | 90          | 6.32                       | 4.58                      | 3.26     |
|               |                  | <i>R3mr</i> | 4.0380             | 4.0380       | 4.0380       | 90.0725     |                            |                           |          |
| BS-PT64       | 400              | <i>P4mm</i> | 4.0191             | 0.0000       | 4.0631       | 90          | 7.15                       | 5.04                      | 3.70     |
|               |                  | <i>R3mr</i> | 4.0312             | 0.0000       | 0.0000       | 90.0466     |                            |                           |          |
| PIN-BS-PT     | 200              | <i>P4mm</i> | 4.0100             | 4.0100       | 4.0666       | 90          | 7.59                       | 5.35                      | 3.96     |
|               |                  | <i>R3mr</i> | 4.0359             | 4.0359       | 4.0359       | 89.9026     |                            |                           |          |
| PIN-BS-PT     | 400              | <i>P4mm</i> | 4.0231             | 4.0231       | 4.0584       | 90          | 10.44                      | 6.81                      | 5.43     |
|               |                  | <i>R3mr</i> | 4.0287             | 4.0287       | 4.0287       | 90.0298     |                            |                           |          |
| BS-PT-<br>BZH | 200              | <i>P4mm</i> | 4.0035             | 4.0035       | 4.0747       | 90          | 8.30                       | 5.67                      | 4.20     |
|               |                  | <i>R3mr</i> | 4.0400             | 4.0400       | 4.0400       | 89.8344     |                            |                           |          |
| BS-PT-<br>BZH | 400              | <i>P4mm</i> | 4.0142             | 4.0142       | 4.0542       | 90          | 8.81                       | 6.20                      | 4.41     |
|               |                  | <i>R3mr</i> | 4.0302             | 4.0302       | 4.0302       | 89.9337     |                            |                           |          |

- 1 H. Zhao, Y. Hou, X. Yu, J. Fu, M. Zheng and M. Zhu, *J. Am. Ceram. Soc.*, 2019, **102**, 5316-5327.
- 2 C. Huang, K. Cai, Y. Wang, Y. Bai and D. Guo, *J. Mater. Chem. C*, 2018, **6**, 1433-1444.
- 3 F. Li, Z. Xu, X. Wei and X. Yao, *J Electroceram*, 2009, **24**, 294-299.
- 4 H. Zhao, Y. Hou, M. Zheng, X. Yu, X. Yan, L. Li and M. Zhu, *Mater. Lett.*, 2019, **236**, 633-636.
- 5 Q. Liu, J. Li, L. Zhao, Y. Zhang, J. Gao, W. Sun, K. Wang and L. Li, *J. Mater. Chem. C*, 2018, **6**, 1116-1125.
- 6 M. Davies, E. Aksel and J. L. Jones, *J. Am. Ceram. Soc.*, 2011, **94**, 1314-1316.
- 7 M. Fang, S. Rajput, Z. Dai, Y. Ji, Y. Hao and X. Ren, *Acta Mater.*, 2019, **169**, 155-161.
- 8 T. Leist, J. Chen, W. Jo, E. Aulbach, J. Suffner and J. Rödel, *J. Am. Ceram. Soc.*, 2012, **95**, 711-715.
- 9 S. Zhang, C. A. Randall and T. R. Shrout, *Solid State Commun.*, 2004, **131**, 41-45.
